# Supplementary material
Source: PubMed Central journal article supplement (PMC3085398)
Supplement: NIHMS247468-supplement-01.pdf [file NIHMS247468-supplement-01.pdf]

# Alcohol Risk Management in College Settings

## The Safer California Universities Randomized Trial

Robert F. Saltz, PhD, Mallie J. Paschall, PhD, Richard P. McGaffigan, MSW, Peter M.O. Nygaard, PhD

---

### Appendix A

Multilevel logistic and linear regression analyses were conducted to examine the effects of intervention condition on outcome slopes for dichotomous and continuous dependent variables, respectively. Student-level models were represented by the following general equation:

$$\text{Prob}(Y_{ij}) \text{ or } Y_{ij} = \beta_{0j} + \beta_{1j}(\text{Time}) + \beta_{xj}(\text{Covariates}) + r_{ij},$$

where  $\text{Prob}(Y_{ij})$  is the conditional probability of intoxication at each setting (logistic regression);  $Y_{ij}$  is the proportion of times drunk at each setting (linear regression) for student  $i$  at university  $j$ ;  $\beta_{0j}$  is the mean outcome at university  $j$  at baseline;  $\beta_{1j}(\text{Time})$  is the slope of the relationship between mean outcome at university  $j$  for Time (1=baseline years, 2=intervention years);  $\beta_{xj}(\text{Covariates})$  are slopes of relationships between student-level covariates (e.g., age, gender) and mean outcome at university  $j$ ; and  $r_{ij}$  is the unique (random) effect associated with student  $i$  at university  $j$ . University-level models were based on the following equations:

$$\beta_{0j} = \gamma_{00} + \gamma_{01}(\text{Intervention Condition}) + \gamma_{0x}(\text{Covariates}) + \mu_{0j};$$

$$\beta_{1j} = \gamma_{10} + \gamma_{11}(\text{Intervention Condition}) + \mu_{1j}.$$

In the first model,  $\gamma_{00}$  is the mean university-level outcome at baseline;  $\gamma_{01}(\text{Intervention Condition})$  is the main effect of Safer intervention condition on the outcome;  $\gamma_{0x}(\text{Covariates})$  are slopes of relationships between university covariates and the outcome; and  $\mu_{0j}$  is the unique (random) effect associated with university  $j$ . In the second model,  $\gamma_{10}$  is the mean university-level outcome slope across survey years;  $\gamma_{11}(\text{Intervention Condition})$  is the effect of implementing Safer interventions on outcome slope across survey years (i.e., Time  $\times$  Intervention effect); and  $\mu_{1j}$  is the unique (random) effect on the outcome slope associated with university  $j$  (i.e., Time  $\times$  University effect). Ancillary analyses also were conducted to examine possible differences in intervention effects based on the level or intensity of intervention implementation (i.e., Time  $\times$  Intervention effect).

Hierarchical linear and nonlinear modeling (HLM) software, version 6, provided adjustment for variance in outcomes that is attributable to clustering of student observations within universities. This between-institution variation is measured by the intraclass correlation coefficient, which ranged for the outcomes from 0.01 to 0.05 (mean=0.03).

## Appendix B

Multilevel logistic regression models predicting risk of intoxication last time at each setting; OR (95% CI)

| Predictor                             | Greek party        | Dorm party        | Campus event      | Off-campus party   | Bar/restaurant     | Outdoors          | Any setting       |
|---------------------------------------|--------------------|-------------------|-------------------|--------------------|--------------------|-------------------|-------------------|
| Time × condition                      | 0.86 (0.58, 1.26)  | 0.93 (0.59, 1.47) | 0.89 (0.59, 1.34) | 0.81 (0.68, 0.97)  | 0.76 (0.62, 0.94)  | 1.13 (0.56, 2.27) | 0.80 (0.65, 0.97) |
| Intervention group                    | 1.15 (0.73, 1.82)  | 0.92 (0.52, 1.65) | 0.90 (0.50, 1.64) | 1.29 (0.99, 1.69)  | 1.66 (1.13, 2.46)  | 0.86 (0.33, 2.23) | 1.30 (0.99, 1.72) |
| Control group (ref)                   | —                  | —                 | —                 | —                  | —                  | —                 | —                 |
| <b>Time (survey years)</b>            |                    |                   |                   |                    |                    |                   |                   |
| 2005–2006 (intervention)              | 1.27 (0.97, 1.66)  | 1.24 (0.91, 1.69) | 1.46 (1.12, 1.90) | 1.28 (1.14, 1.45)  | 1.17 (1.01, 1.36)  | 0.50 (0.31, 0.82) | 1.24 (1.07, 1.42) |
| 2003–2004 (baseline, ref)             | —                  | —                 | —                 | —                  | —                  | —                 | —                 |
| <b>Student covariates<sup>a</sup></b> |                    |                   |                   |                    |                    |                   |                   |
| Aged <21 years                        | 1.04 (0.84, 1.28)  | 0.94 (0.72, 1.22) | 0.91 (0.68, 1.21) | 0.94 (0.85, 1.06)  | 0.49 (0.41, 0.58)  | 0.70 (0.52, 0.94) | 0.87 (0.78, 0.97) |
| Male                                  | 1.37 (1.19, 1.59)  | 1.36 (1.15, 1.62) | 1.54 (1.25, 1.90) | 1.21 (1.12, 1.32)  | 1.10 (0.99, 1.23)  | 1.43 (1.16, 1.76) | 1.22 (1.13, 1.32) |
| White                                 | 1.50 (1.10, 2.05)  | 1.51 (1.04, 2.18) | 0.92 (0.60, 1.42) | 1.42 (1.19, 1.70)  | 1.37 (1.07, 1.76)  | 2.41 (1.54, 3.75) | 1.32 (1.11, 1.57) |
| Hispanic                              | 0.88 (0.66, 1.18)  | 1.36 (0.96, 1.93) | 0.80 (0.53, 1.22) | 0.98 (0.82, 1.16)  | 1.07 (0.84, 1.36)  | 1.89 (1.27, 2.81) | 0.98 (0.83, 1.15) |
| Black                                 | 0.82 (0.50, 1.34)  | 1.37 (0.77, 2.45) | 0.62 (0.31, 1.25) | 0.82 (0.61, 1.12)  | 0.62 (0.40, 0.93)  | 2.75 (1.23, 6.16) | 0.77 (0.58, 1.01) |
| Asian                                 | 0.82 (0.58, 1.15)  | 0.94 (0.63, 1.42) | 0.42 (0.25, 0.69) | 0.70 (0.58, 0.86)  | 0.74 (0.56, 0.98)  | 1.13 (0.67, 1.94) | 0.64 (0.53, 0.78) |
| Married                               | 0.93 (0.46, 1.88)  | 1.15 (0.51, 2.57) | 0.55 (0.27, 1.10) | 0.57 (0.46, 0.70)  | 0.39 (0.30, 0.51)  | 0.43 (0.19, 1.00) | 0.41 (0.34, 0.49) |
| Freshman                              | 1.29 (0.92, 1.83)  | 1.31 (0.88, 1.95) | 1.17 (0.70, 1.96) | 1.39 (1.13, 1.71)  | 1.23 (0.83, 1.83)  | 2.30 (1.38, 3.85) | 1.48 (1.22, 1.81) |
| Sophomore                             | 1.13 (0.89, 1.45)  | 1.29 (0.95, 1.75) | 0.89 (0.63, 1.28) | 1.08 (0.94, 1.29)  | 1.02 (0.81, 1.29)  | 1.23 (0.85, 1.78) | 1.13 (0.99, 1.29) |
| Junior                                | 1.11 (0.91, 1.37)  | 1.13 (0.87, 1.47) | 0.86 (0.65, 1.12) | 1.03 (0.93, 1.14)  | 1.15 (1.03, 1.29)  | 1.25 (0.96, 1.64) | 1.06 (0.97, 1.17) |
| House/apartment                       | 0.89 (0.73, 1.09)  | 0.76 (0.63, 0.93) | 1.11 (0.82, 1.52) | 1.09 (0.96, 1.24)  | 1.04 (0.84, 1.30)  | 0.84 (0.62, 1.15) | 0.85 (0.76, 0.97) |
| Greek house                           | 1.29 (0.93, 1.78)  | 1.45 (0.93, 2.28) | 1.39 (0.87, 2.22) | 1.44 (1.10, 1.89)  | 1.78 (1.25, 2.54)  | 1.38 (0.77, 2.48) | 1.61 (1.18, 2.20) |
| Co-op/other housing                   | 0.79 (0.43, 1.46)  | 0.65 (0.32, 1.31) | 3.17 (1.25, 8.08) | 1.01 (0.72, 1.41)  | 1.04 (0.67, 1.61)  | 0.59 (0.24, 1.43) | 0.87 (0.64, 1.19) |
| Employed                              | 1.00 (0.89, 1.13)  | 1.06 (0.92, 1.22) | 0.99 (0.83, 1.18) | 1.12 (1.04, 1.20)  | 0.96 (0.87, 1.06)  | 1.07 (0.89, 1.29) | 1.08 (1.01, 1.16) |
| Greek member                          | 1.33 (1.15, 1.54)  | 0.81 (0.66, 1.00) | 1.79 (1.43, 2.24) | 1.07 (0.95, 1.19)  | 1.67 (1.45, 1.93)  | 1.30 (0.99, 1.71) | 1.70 (1.52, 1.91) |
| Athlete                               | 1.16 (1.02, 1.32)  | 0.92 (0.78, 1.08) | 1.06 (0.88, 1.28) | 1.25 (1.15, 1.37)  | 1.31 (1.16, 1.48)  | 1.21 (0.98, 1.48) | 1.49 (1.36, 1.63) |
| Have car/vehicle                      | 0.96 (0.95, 0.97)  | 1.04 (0.88, 1.23) | 1.18 (0.95, 1.46) | 0.99 (0.91, 1.09)  | 1.21 (1.06, 1.39)  | 0.79 (0.63, 1.00) | 1.09 (0.99, 1.19) |
| Weekends at campus                    | 1.11 (0.96, 1.29)  | 1.25 (1.07, 1.46) | 1.05 (0.86, 1.27) | 1.18 (1.09, 1.27)  | 1.06 (0.96, 1.17)  | 0.93 (0.77, 1.13) | 1.20 (1.12, 1.42) |
| Grade point average                   | 0.88 (0.78, 0.98)  | 1.05 (0.93, 1.19) | 0.91 (0.78, 1.07) | 0.88 (0.83, 0.94)  | 0.79 (0.72, 0.86)  | 0.76 (0.66, 0.89) | 0.83 (0.78, 0.88) |
| Positive expectancies                 | 1.05 (1.04, 1.06)  | 1.05 (1.04, 1.06) | 1.04 (1.03, 1.05) | 1.06 (1.05, 1.07)  | 1.05 (1.04, 1.06)  | 1.04 (1.02, 1.05) | 1.07 (1.06, 1.08) |
| Negative expectancies                 | 0.96 (0.95, 0.97)  | 0.96 (0.95, 0.97) | 0.95 (0.94, 0.97) | 0.95 (0.94, 0.96)  | 0.97 (0.96, 0.98)  | 0.95 (0.94, 0.97) | 0.94 (0.93, 0.95) |
| Religiosity                           | 0.88 (0.83, 0.94)  | 0.89 (0.83, 0.96) | 0.85 (0.78, 0.93) | 0.85 (0.82, 0.88)  | 0.84 (0.80, 0.88)  | 0.80 (0.73, 0.88) | 0.83 (0.80, 0.86) |
| General health                        | 0.89 (0.81, 0.99)  | 0.97 (0.87, 1.09) | 0.83 (0.72, 0.96) | 0.82 (0.87, 0.97)  | 0.91 (0.85, 0.98)  | 0.91 (0.79, 1.05) | 0.89 (0.85, 0.95) |
| Body weight                           | 1.00 (0.99, 1.01)  | 1.00 (0.99, 1.00) | 1.00 (0.99, 1.00) | 1.00 (0.99, 1.01)  | 1.00 (0.99, 1.01)  | 1.00 (0.99, 1.01) | 1.00 (0.99, 1.01) |
| Past-year drinker                     | 45.4 (20.6, 100.1) | 58.7 (24, 143.4)  | 66.3 (19.6, 225)  | 84.8 (45.9, 156.2) | 45.8 (20.5, 102.7) | 52.9 (16.4, 171)  | 66.5 (44.5, 99.4) |
| <b>University covariates</b>          |                    |                   |                   |                    |                    |                   |                   |
| UC vs CSU system                      | 0.84 (0.59, 1.18)  | 1.25 (0.85, 1.84) | 0.72 (0.48, 1.10) | 1.00 (0.84, 1.19)  | 0.63 (0.40, 0.99)  | 0.74 (0.39, 1.40) | 0.89 (0.76, 1.05) |
| White (%)                             | 1.00 (0.99, 1.02)  | 1.01 (0.99, 1.03) | 0.99 (0.97, 1.01) | 1.00 (0.99, 1.01)  | 1.00 (0.99, 1.02)  | 1.01 (0.99, 1.04) | 1.00 (0.99, 1.01) |
| Living on campus (%)                  | 0.99 (0.97, 1.00)  | 0.99 (0.97, 1.00) | 1.01 (0.99, 1.02) | 1.00 (0.99, 1.01)  | 1.02 (1.00, 1.04)  | 1.00 (0.98, 1.03) | 1.00 (0.99, 1.01) |
| Greek members (%)                     | 1.08 (1.03, 1.12)  | 0.99 (0.95, 1.03) | 1.01 (0.96, 1.06) | 1.00 (0.98, 1.02)  | 1.00 (0.95, 1.06)  | 0.98 (0.91, 1.05) | 1.01 (0.99, 1.03) |
| Heavy episodic drinking (%)           | 5.39 (1.77, 16.43) | 3.29 (0.83, 12.9) | 6.10 (1.59, 23.4) | 3.24 (1.83, 5.74)  | 2.71 (0.58, 12.69) | 3.36 (0.42, 26.8) | 4.06 (2.34, 6.94) |
| ≥80 miles from large city             | 0.35 (0.18, 0.67)  | 0.45 (0.23, 0.88) | 0.60 (0.29, 1.24) | 0.64 (0.46, 0.89)  | 0.90 (0.36, 2.25)  | 0.60 (0.18, 2.00) | 0.60 (0.44, 0.81) |

<sup>a</sup>Referent groups for student covariates are students aged  $\geq 21$  years, women, students of other ethnic or multi-ethnic groups, seniors, students living in residence halls, unemployed students, nonmembers of Greek organizations, students not involved in organized athletics, students without a motorized vehicle, students who do not spend most weekends on or near campus, and nondrinkers, respectively.  
CSU, California State University; UC, University of California
